# Supplementary material for: Task-Related Edge Density (TED)—A New Method for Revealing Dynamic Network Formation in fMRI Data of the Human Brain
Source: PubMed Central journal article supplement (PMC4920409; doi:10.1371/journal.pone.0158185), 2016-06-24

CDF estimation in dependency of the number of permutations

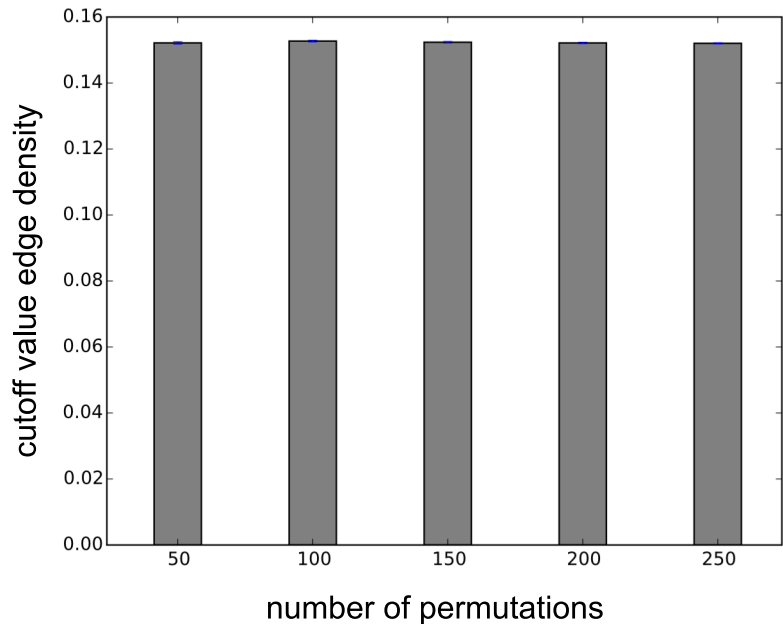

Standard error of CDF estimation (40 samples)

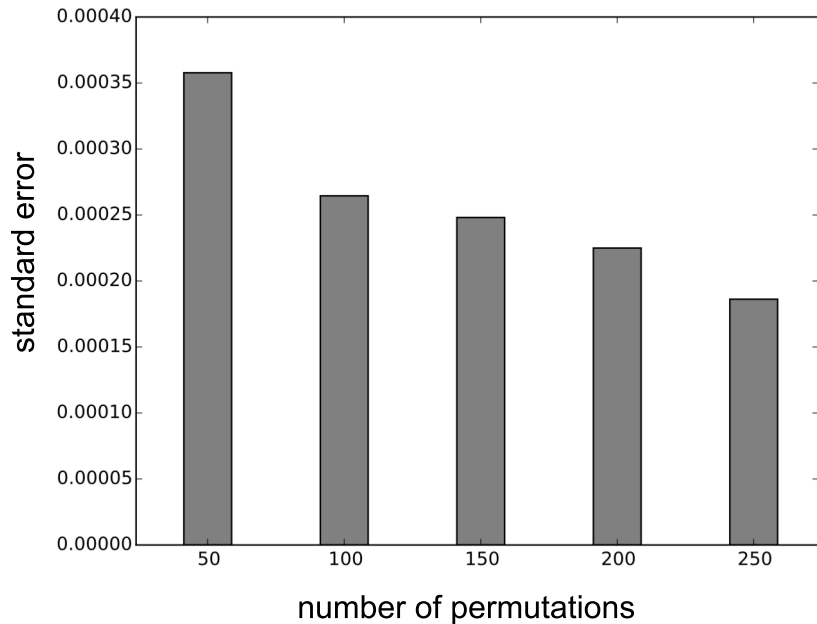

Supplement: pone.0158185.s005.pdf [file pone.0158185.s005.pdf]
